# Supplementary material for: Electrocatalytic two-electron oxygen reduction over nitrogen doped hollow carbon nanospheres
Source: Royal Society of Chemistry journal article supplement (doi:10.1039/d2cc01238c), 2022-01-01
Supplement: d2cc01238c1.pdf [file d2cc01238c1.pdf]

## Electronic Supplementary Information

### Experimental Section

**Materials:** Ethanol, ammonia, tetraethyl orthosilicate (TEOS), cerium (IV) sulfate ( $\text{Ce}(\text{SO}_4)_2$ ), resorcinol, formaldehyde, hydrofluoric acid, and ethylenediamine (EDA) were readily available and purchased from Aladdin Ltd. (Shanghai, China). Isopropyl alcohol (IPA) and potassium hydroxide (KOH) were purchased from Beijing Chemical Corporation. (Beijing, China). Nafion solution (5% w/w) was obtained from Sigma-Aldrich Chemical Reagent Co. Ltd. Ultrapure water ( $18.25 \Omega$ ) used throughout all experiments was purified through a Millipore system. All the reagents are of analytical grade and were used as purchased without further purification.

**Catalyst synthesis:** Typically, 4.8 ml of ammonia aqueous solution (28 wt%) was added to a mixture of deionized water (16.5 mL) and ethanol (113.4 mL), after 10 min vigorous stirring, 5 ml TEOS was added and stirring continued for 10 min. Subsequently, 0.32 g resorcinol, 0.46 ml formaldehyde and 0.1 mL EDA were added to the stirred solution. Then, the mixture was vigorously stirred for 18 h and transferred to 200 mL of Teflon-lined autoclave ( $100 \text{ }^\circ\text{C}$ ) for another 24 h. The brown products were obtained by centrifugation and dried at  $80 \text{ }^\circ\text{C}$  for 12 h. Finally, the solid samples were carbonized by heating at  $750 \text{ }^\circ\text{C}$  for 2 h under an Ar gas (99.999%) environment in a tube furnace, the  $\text{SiO}_2$  templates were removed by treating the material in dilute HF solution overnight, and the control samples NHCSs-x (“x” denotes the EDA amount,  $x = 0.05, 0.15$ ) were prepared with different amounts of EDA. HCSs were prepared in the same way except without EDA.

**Characterization:** XRD patterns were acquired on a Shimadzu XRD-6100 diffractometer with Cu  $K\alpha$  radiation (40 kV, 30 mA) of wavelength 0.154 nm (Japan). SEM images were collected on a GeminiSEM 300 scanning electron microscope (ZEISS, Germany) at an accelerating voltage of 10 kV. XPS measurements were performed on an ESCALABMK II X-ray photoelectron spectrometer using Mg as the exciting source. Raman spectroscopy measurements were performed on a Renishaw 1000 Raman imaging microscope system with an excitation wavelength of 632.8 nm.

TEM images were collected on a FEI Tecnai G2 F20 SWIN transmission electron microscope operated at 200 kV.

**Electrochemical measurements:** All the electrochemical experiments were performed on an electrochemical workstation (CHI 760E) in a three-electrode system. For the rotating ring-disk electrode (RRDE) measurements, a glassy carbon electrode with a diameter of 5.6 mm (0.246 cm<sup>2</sup>), a Hg/HgO (1 M KOH filling solution) electrode and a platinum plate electrode (1 × 1 cm<sup>2</sup>) were employed as working electrode, reference electrode, and counter electrode, respectively. The potentials reported in this experiment were converted to reversible hydrogen electrode (RHE) scale via normalization processing with the following equation: E (vs. RHE) = E (vs. Hg/HgO) + 0.059 × pH + 0.098 V. The RRDE was polished with different particle size of alumina powder (1 μm and 0.05μm) for 5 min and ultra-sonicated in ultrapure water for 10 s. The ink was prepared by mixing the catalysts in ultrapure water, IPA (v/v = 4/1) to achieve a catalyst concentration of 3 mg mL<sup>-1</sup> with 20 μL Nafion solution via sonication for 30 min. Working electrode was obtained through spin-coating 5 μl of the catalytic ink onto the glassy carbon electrode (disk area: 0.246 cm<sup>2</sup>; ring area: 0.186 cm<sup>2</sup>) after natural drying. Before the linear sweep voltammetry (LSV) tests, cyclic voltammetry (CV) was performed in N<sub>2</sub>-saturated 0.1 M KOH at a scan rate of 50 mV s<sup>-1</sup> for around 20 cycles, in which a steady CV response was obtained. Pt ring was then electrochemically cleaned in the same potential range at a scan rate of 500 mV s<sup>-1</sup> for 10 cycles. O<sub>2</sub> gas was purged into the electrolyte for 5 min (caution: if the time interval between the Pt ring cleaning and ORR measurement is long, the H<sub>2</sub>O<sub>2</sub> selectivity can be underestimated due to the surface passivation of the Pt ring). The H<sub>2</sub>O<sub>2</sub> production activity was assessed by LSV in O<sub>2</sub>-saturated 0.1 M KOH electrolyte at a scan rate of 10 mV s<sup>-1</sup> and a rotation speed of 1600 rpm. During the LSV testing, the Pt ring potential was fixed at 1.2 V versus. RHE. The H<sub>2</sub>O<sub>2</sub> selectivity was calculated using the following relation:

$$\text{H}_2\text{O}_2(\%) = 200 \times I_{\text{ring}} / N / (I_{\text{disk}} + I_{\text{ring}} / N)$$

where  $I_{\text{ring}}$  is the ring current,  $I_{\text{disk}}$  is the disk current and  $N$  is the collection efficiency (0.35 after calibration).

The electron transferred number of per oxygen molecule in the ORR can be calculated by the Koutechy-Levich (K-L) equation (1).

$$1/J=1/J_k+B^{-1}\omega^{-1/2} \quad (1)$$

Where  $J_k$  is the kinetic current density and  $\omega$  is the rotation rate. The value of B could be calculated from the slope of Levich equation (2) as follows:

$$B=0.2nF(D_0)^{2/3}\nu^{-1/6}C_0 \quad (2)$$

Where  $n$  is the electron transfer number of per oxygen molecule,  $F$  is the Faraday constant ( $F=96485 \text{ C mol}^{-1}$ ),  $C_0$  is the bulk concentration of  $O_2$  ( $1.2 \times 10^{-1} \text{ mol cm}^{-3}$ ),  $D_0$  is the diffusion coefficient of  $O_2$  in 0.1 M KOH ( $1.9 \times 10^{-5} \text{ cm}^2 \text{ s}^{-1}$ ),  $\nu$  is the kinetic viscosity ( $0.01 \text{ cm}^2 \text{ s}^{-1}$ ), the constant is 0.2 when the rotation speed unit is represented as rpm.

**The electrogeneration of  $H_2O_2$ :** The electro-generation of  $H_2O_2$  was evaluated in a two-compartment cell with Nafion membrane as separator. First, the membrane was protonated by in 5wt %  $H_2O_2$  aqueous solution at 80 °C for 1 h, then washed with ultrapure water until the pH value of the water returned to neutral, followed by boiling with dilute  $H_2SO_4$  (5 wt%) at 80 °C for 1 h. Finally, the membrane was soaked with ultrapure water for 4 h. The electrochemical experiments were carried out with an electrochemical workstation (CHI 760E) using a three-electrode system with prepared NHCSs-carbon paper (NHCSs/CP,  $0.05 \text{ mg cm}^{-2}$ ) electrode, Pt plate and Hg/HgO electrode as the working electrode, counter electrode and reference electrode, respectively.

To quantify the  $H_2O_2$  produced, the samples were collected at certain time and mixed with same volume of  $Ce(SO_4)_2$  solution ( $0.1 \text{ mmol L}^{-1}$ ). The  $H_2O_2$  yield was measured by using the indicator of  $Ce(SO_4)_2$  ( $2Ce^{4+} + H_2O_2 \rightarrow 2Ce^{3+} + 2H^+ + O_2$ ). The generated complex compound solution was detected with UV-vis spectrophotometer. A typical concentration-absorbance curve was calibrated by linear fitting the absorbance values at wavelength length of 320 nm for various known concentration of 0.02, 0.04, 0.06, 0.08, 0.1 mM of  $Ce^{4+}$ . The fitting curve ( $y = 0.4.8525x - 0.06965$ ,  $R^2 = 0.99918$ ) shows good linear relation of absorbance value with  $H_2O_2$  concentration. The yield of  $H_2O_2$  was finally determined based on the reduced  $Ce^{4+}$  concentration. The

FE for H<sub>2</sub>O<sub>2</sub> generation in H-cell was calculated as follows:

$$FE\% = \frac{\text{mole of generation } H_2O_2 \times 2 \times 96485}{\text{total consumed charge (C)}}$$

The electrochemical impedance spectroscopy (EIS) was conducted from 100,000 to 1 Hz to determine the uncompensated resistance (Ru) in a high-frequency range for iR-correction.

**Computational Methods:** The spin-polarized density functional theory (DFT) calculations were performed with Vienna ab initio simulation package (VASP).<sup>1</sup> The interactions between the valence electrons and the ion cores were described by the projected augment wave (PAW) pseudopotential<sup>2</sup> and the exchange-correlation effects by the Perdew, Burke, and Ernzerhof (PBE) functional.<sup>3</sup> The van der Waals (vdW) interaction was included by using the DFT-D3 method.<sup>4</sup> The plane-wave basis was used with a kinetic energy cutoff of 450 eV. The convergence criteria for the total energy and the Hellmann-Feynman force are 10<sup>-5</sup> eV and 0.02 eVÅ<sup>-1</sup>, respectively. To consider the edge effect, two typical graphene nanoribbons have been adopted: the armchair (A) and zigzag (Z) graphene nanoribbons, with the ribbon widths of ~ 14 Å, respectively, as shown in Fig. S15. The COOH functionalized graphene nanoribbons were constructed by replacing an edge H atom with COOH group. In addition, we considered three types N atoms doping in the graphene nanoribbons, i.e., pyrrole N in Figure 4(a)/(d), pyridine N in Figure 4(b)/(e), and graphite N in Figure 4(c)/(f). For all the models, the vacuum layers were set to be 20 Å, to avoid the interaction between slabs. The Brillouin zone was sampled using the Monkhorst-Pack grids<sup>5</sup> of (1×3×1) and (2×1×1), respectively, for armchair and zigzag graphene nanoribbons.

The binding strength for the OOH\* ( $\Delta G_{\text{OOH}^*}$ ) is considered to be the best descriptor to evaluate the activity of 2e<sup>-</sup> ORR.<sup>6-9</sup> For the calculation of  $\Delta G_{\text{OOH}^*}$ , we have adopted the computational hydrogen electrode (CHE) model,<sup>10</sup> using the equation:  $\Delta G = \Delta E + \Delta E_{\text{ZPE}} - T\Delta S$ , where E, E<sub>ZPE</sub>, and S denotes the total electronic energy, zero-point energy, and entropy of the relevant systems, respectively, and T is taken as 298.15 K. E<sub>ZPE</sub> and S of the adsorbed intermediates were obtained from DFT calculations, while those of the free molecules (H<sub>2</sub> and H<sub>2</sub>O) taken from the NIST databases.<sup>11</sup> It is

noted that the solvation effect may bring a small stabilization on the adsorbed OOH, while the reported activity trend should keep unchanged without the solvation correction. In fact, although in the previous works on the  $2e^-$  ORR<sup>6-9</sup> DFT calculations did not consider the solvation effect, the good agreement between the experimental and theoretical results were observed. Therefore, as previous works,<sup>6-9</sup> herein we did not consider the solvation effect in determining the value of  $\Delta G_{\text{OOH}^*}$ , which in turn allows us to make a direct comparison with the previous results.<sup>6-9</sup> The limiting potential ( $U_L$ ) is defined as the maximum potential at which all the reaction steps are downhill in the free energy, and the theoretical overpotential as the difference between the thermodynamic equilibrium potential and the limiting potential.

An active catalyst for  $2e^-$  ORR to  $\text{H}_2\text{O}_2$  should have a sizable limiting potential close to the equilibrium potential (0.70 V vs SHE). The ideal situation is that the Gibbs free energy changes in each elementary step are the same at zero potential so that all reaction free energies are zero when the electrode potential reaches the equilibrium potential. Consequently, the optimal  $\Delta G_{\text{OOH}^*}$  value is estimated to be 4.22 eV.

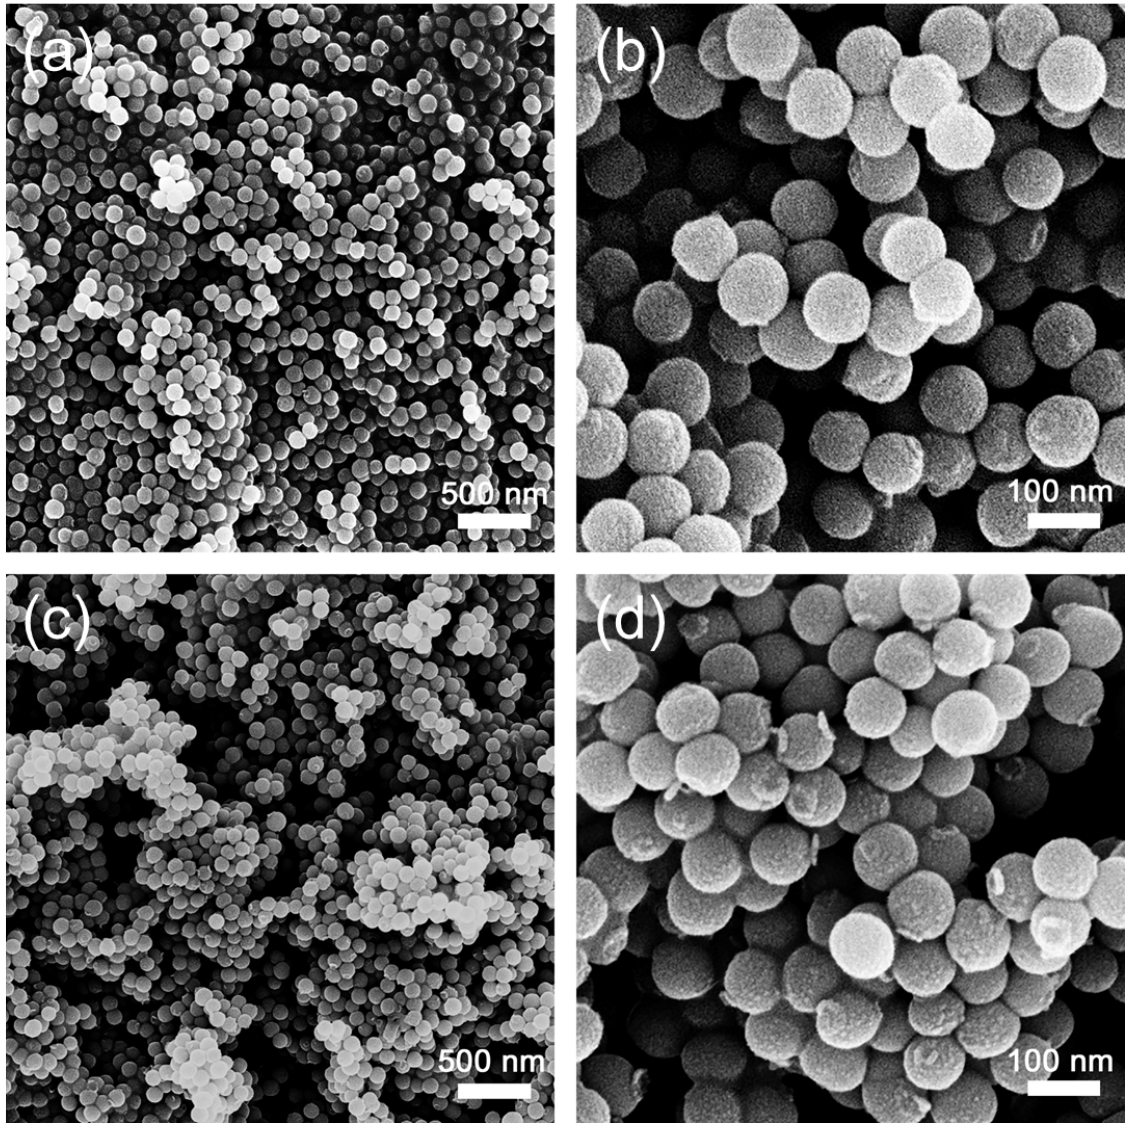

**Fig. S1.** SEM images of SiO<sub>2</sub>@N containing polymer layers before (a, b) and after (c, d) pyrolysis.

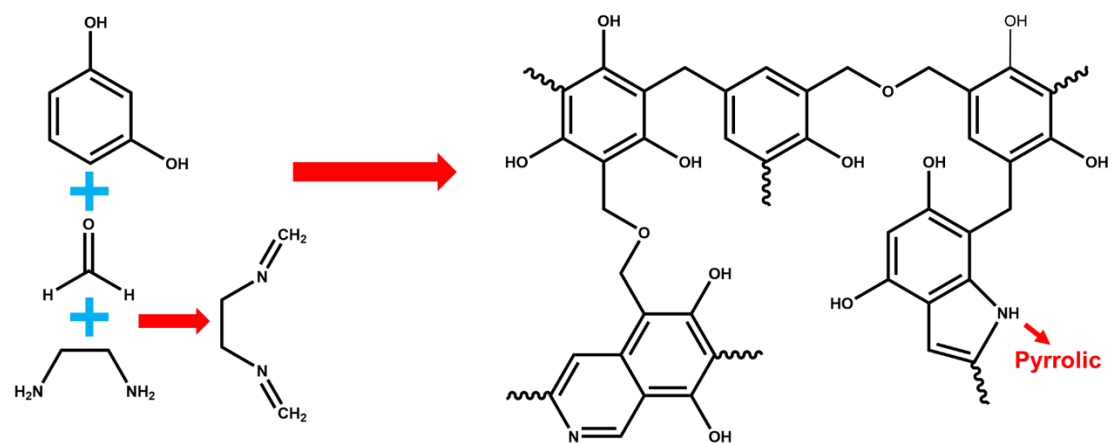

**Fig. S2.** Representation of possible resorcinol–formaldehyde–ethylenediamine Polymerization.

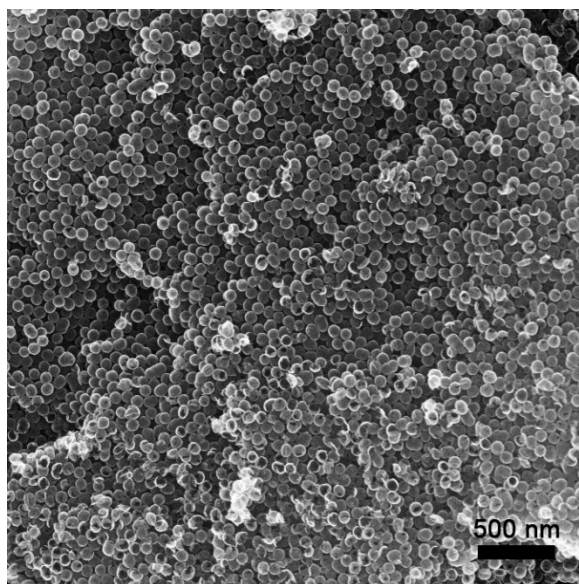

**Fig. S3.** SEM image of NHCSs



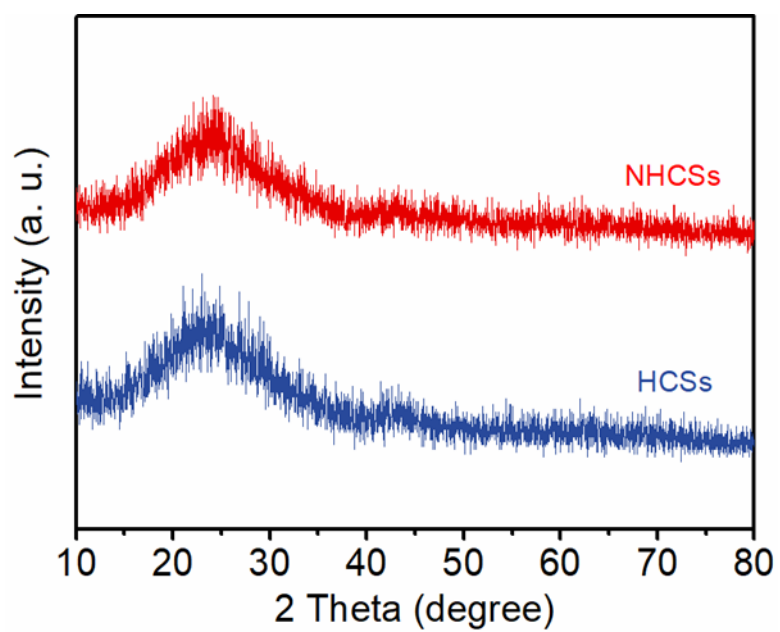

**Fig. S4.** XRD patterns of NHCSs and HCSs.

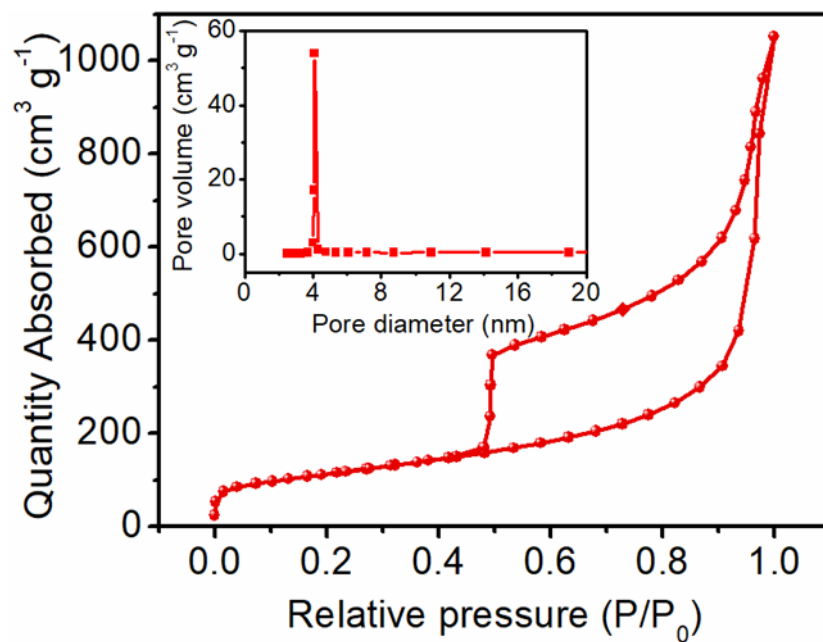

**Fig. S5.**  $\text{N}_2$  sorption isotherms of HNCSSs and corresponding pore size distribution plots (The inset).

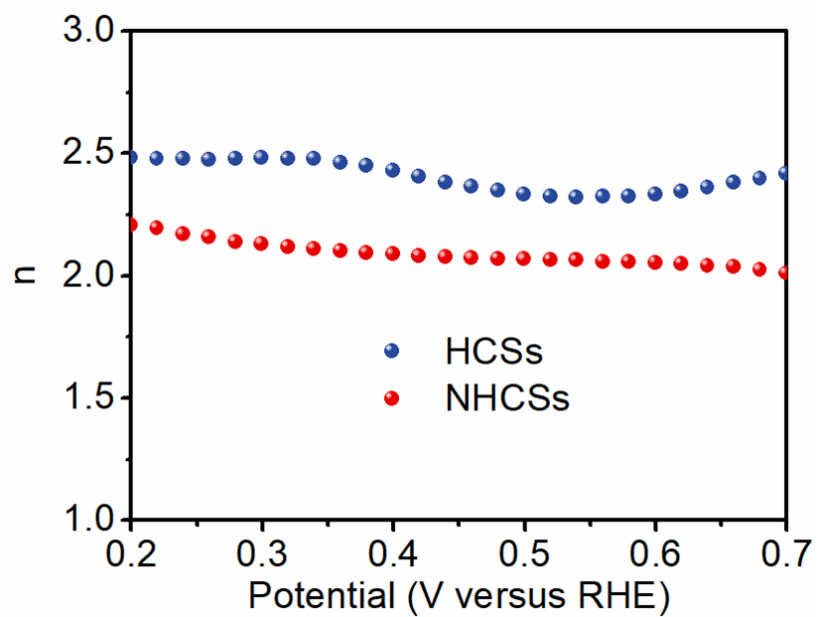

**Fig. S6.** Calculated electron transfer numbers of HCSs and NHCSs.

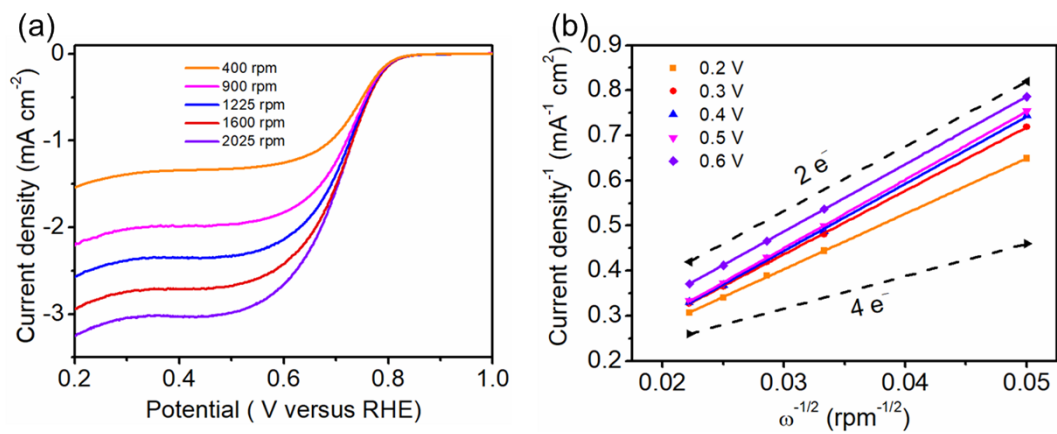

**Fig. S7.** (a) LSV curves of NHCSs at different rotation rates and (b) corresponding Koutecky-Levich (K-L) plots.

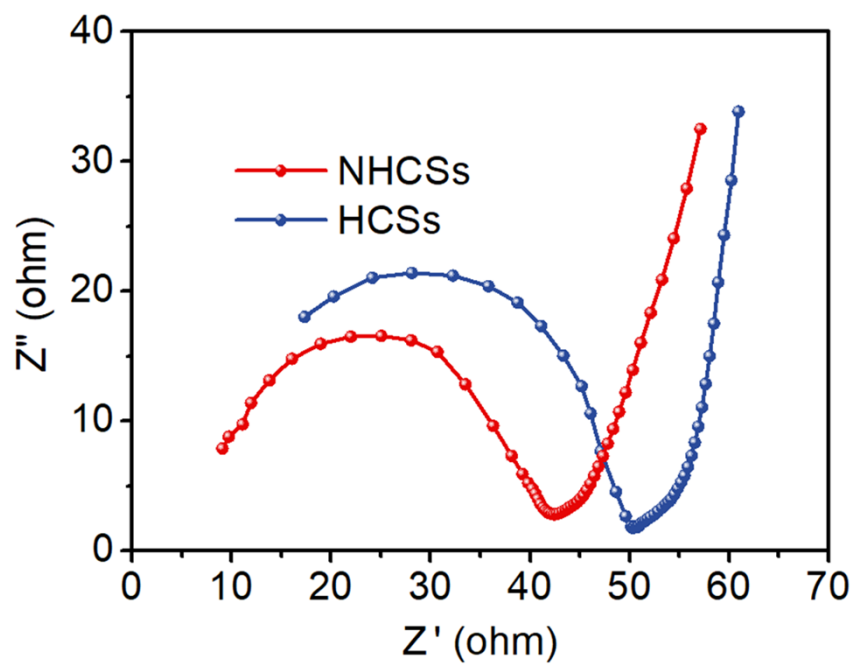

**Fig. S8.** The EIS plots of NHCSs and HCSs on RRDE.

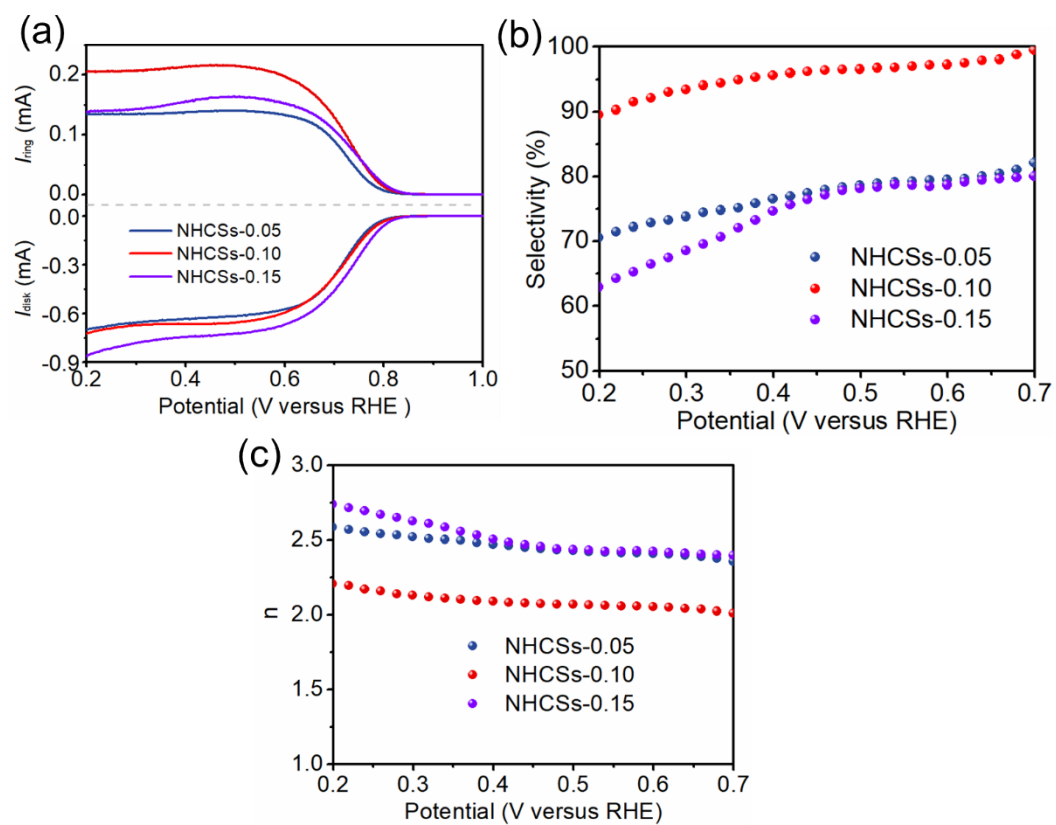

**Fig. S9.** (a) Polarization curves of NHCSs with different concentrations of N doping. (b) Calculated selectivity. (c) Corresponding electron transfer numbers.

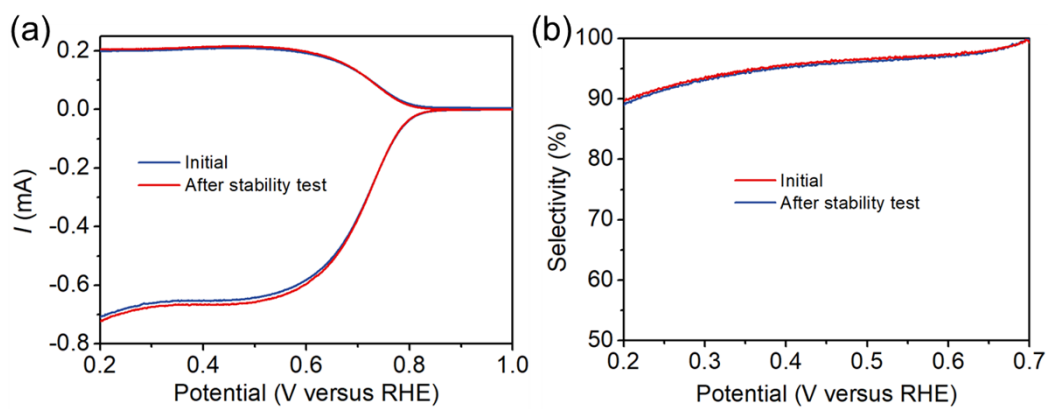

**Fig. S10.** RRDE curves (a) and calculated selectivity (b) before and after 12 h stability test.

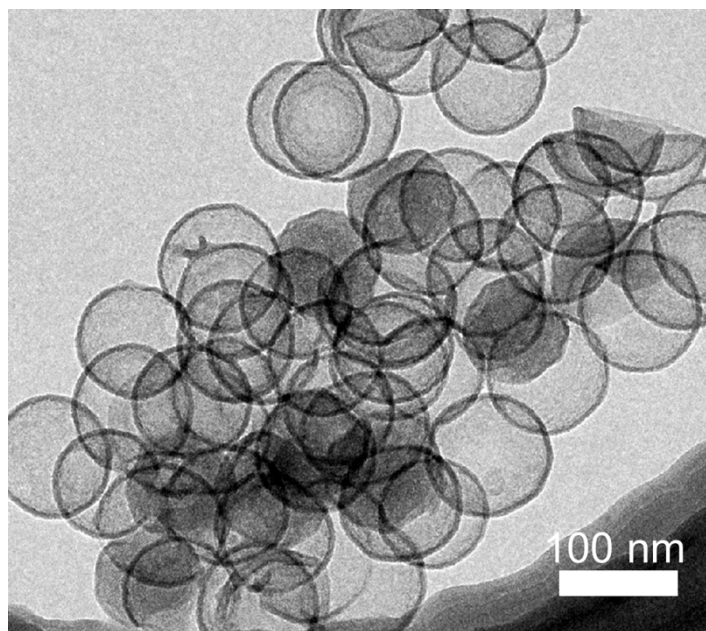

**Fig. S11.** TEM image of NHCSs after long-term RRDE electrolysis.



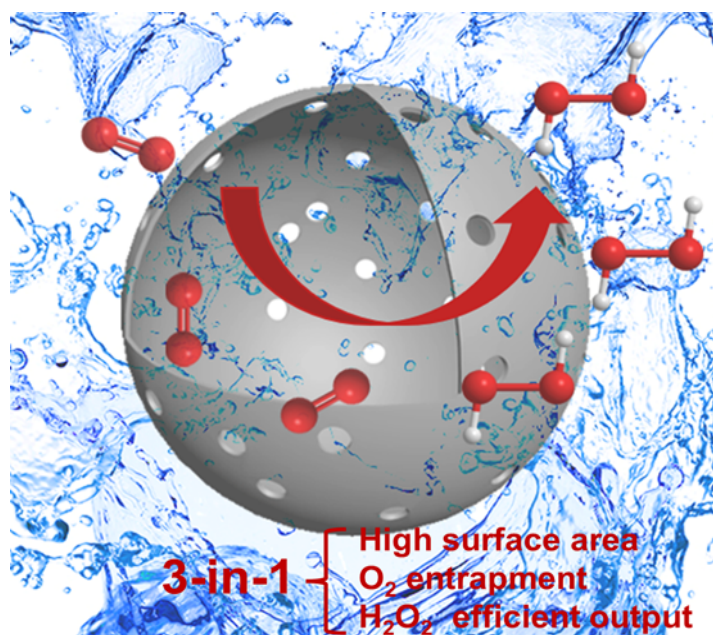

**Fig. S12.** The 3-in-1 effect of NHCSs facilitates  $O_2$ -to- $H_2O_2$  conversion.

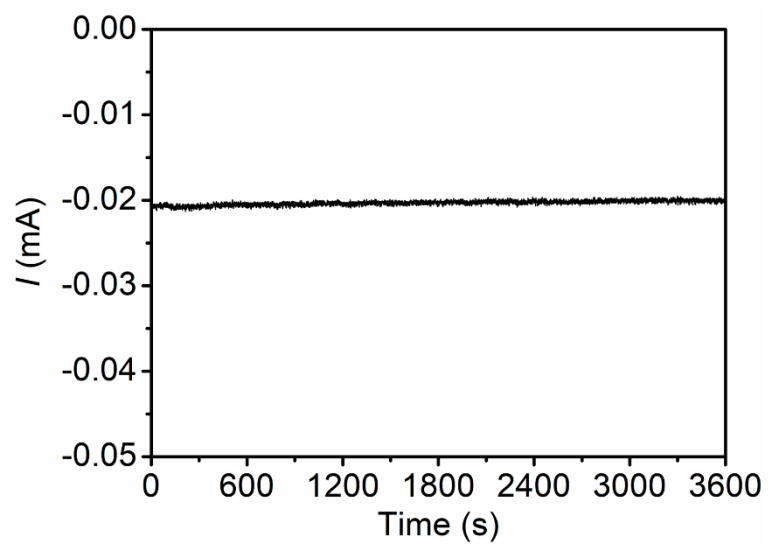

**Fig. S13.** Time-dependent current curve of NHCSs in O<sub>2</sub>-saturated 0.1 M KOH at 0.5 V.

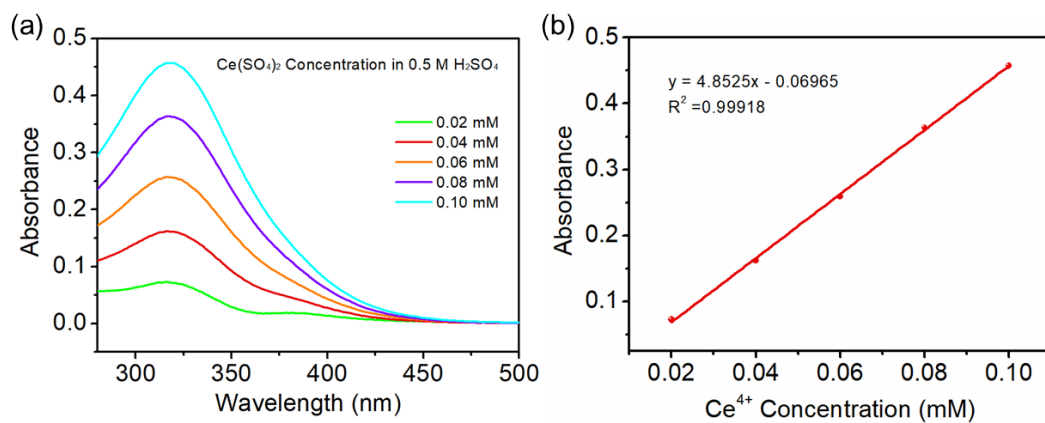

**Fig. S14.** (a) UV-Vis spectra of  $\text{Ce}^{4+}$  solution with various concentrations and (b) corresponding standard curve.

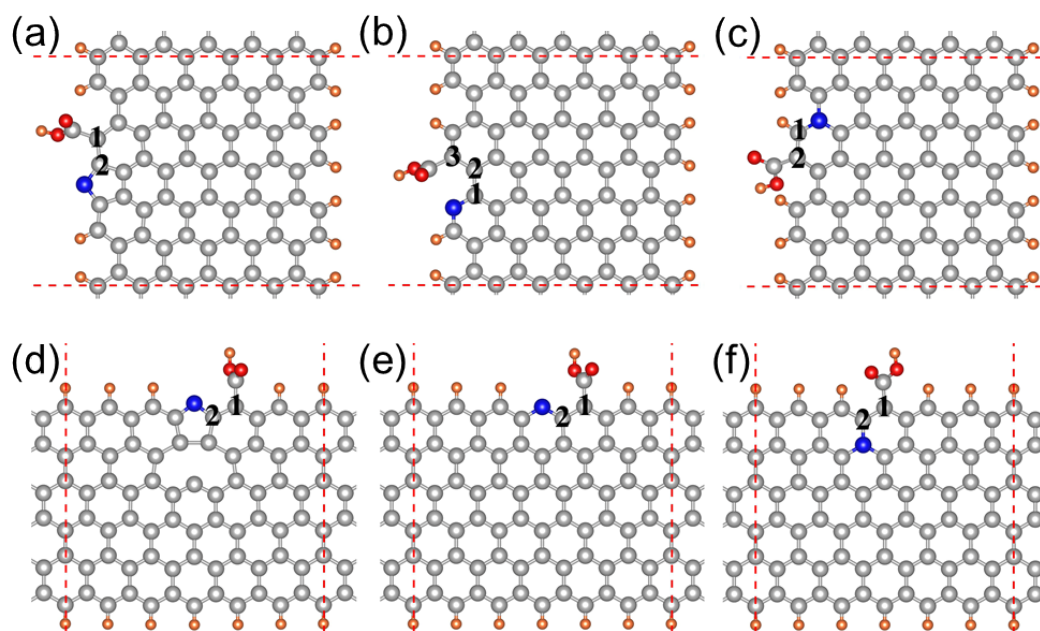

**Fig. S15.** Optimized configurations of COOH group modified graphene nanoribbons with N doping at armchair/zigzag edges in pyrrole type (a)/(d), pyridine type (b)/(e), and graphite type (c)/(f).

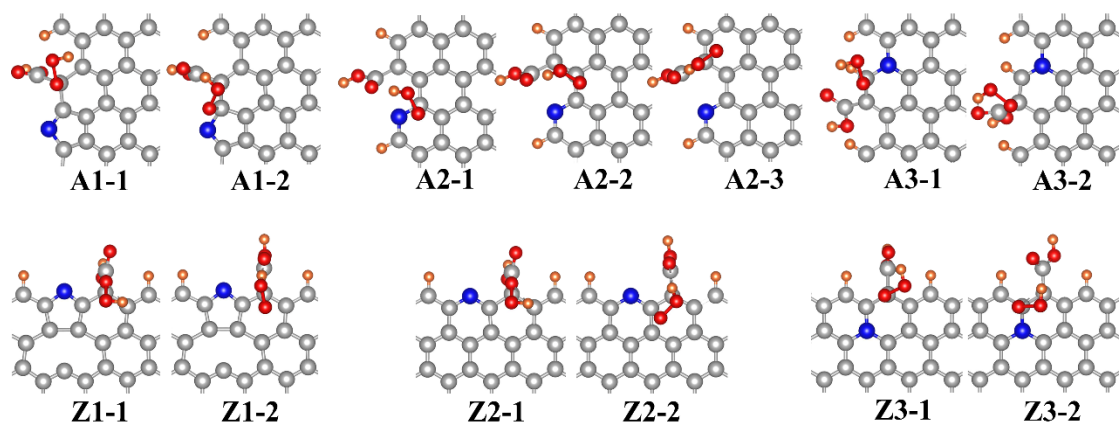

**Fig. S16.** Optimized configurations of OOH intermediates adsorption at different edge sites on N doped and COOH radical modified graphene nanoribbons.

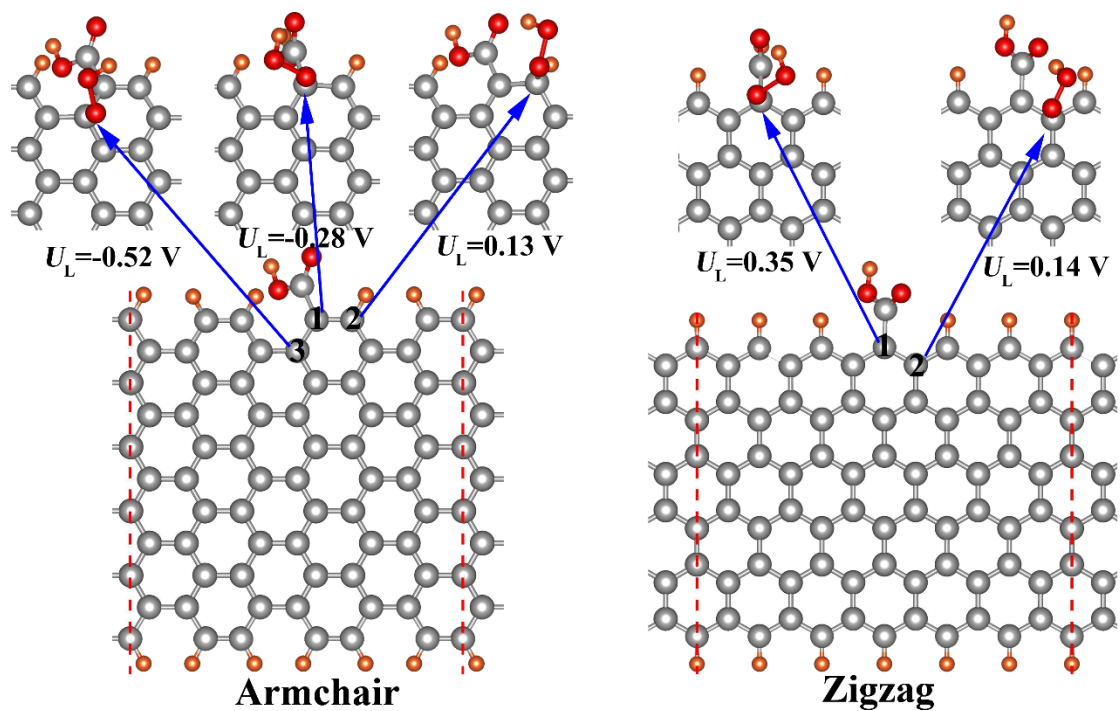

**Fig. S17.** Optimized configurations of OOH intermediates adsorption at different edge sites on COOH modified graphene nanoribbons. The black values are the corresponding limiting potentials.

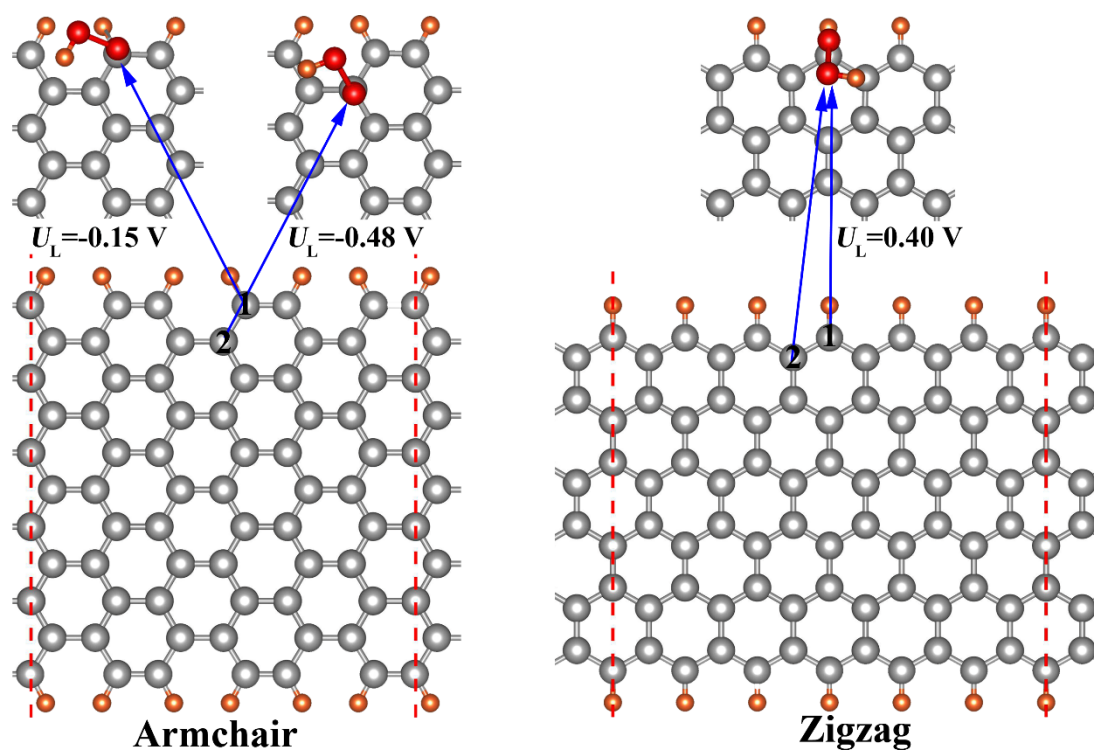

**Fig. S18.** Optimized configurations of OOH intermediates adsorption at different edge sites on pristine graphene nanoribbons. The black values are the corresponding limiting potentials.

**Table S1.** Comparison of the catalytic performance of NHCSs with reported 2e<sup>-</sup> ORR catalysts in alkaline media.

| Electrocatalyst                                                     | Electrolyte      | Selectivity [%] | Onset potential V vs. RHE | Reference        |
|---------------------------------------------------------------------|------------------|-----------------|---------------------------|------------------|
| <b>NHCSs</b>                                                        | <b>0.1 M KOH</b> | <b>96.6</b>     | <b>~-0.82</b>             | <b>This work</b> |
| O-CNTs                                                              | 0.1 M KOH        | 90              | 0.8                       | 7                |
| Bi <sub>2</sub> Te <sub>3</sub> NPs                                 | 0.1 M KOH        | 100             | ~-0.75                    | 12               |
| Co1-NG(O)                                                           | 0.1 M KOH        | 82              | 0.8V                      | 13               |
| N-FLG-8                                                             | 0.1 M KOH        | 95              | 0.8                       | 14               |
| Co-POC-O                                                            | 0.1 M KOH        | 84              | 0.79                      | 15               |
| MOF NSs-300                                                         | 0.1 M KOH        | 99              | 0.75                      | 16               |
| Co-N-C                                                              | 0.1 M KOH        | ~60             | ~-0.82                    | 17               |
| Mo <sub>1</sub> /OSG-H                                              | 0.1 M KOH        | 95              | 0.8                       | 18               |
| F-mrGO (600)                                                        | 0.1 M KOH        | 100             | 0.7                       | 19               |
| BN-C1                                                               | 0.1 M KOH        | 90              | 0.8                       | 20               |
| GO/H <sub>2</sub> O <sub>2</sub> /NH <sub>3</sub> ·H <sub>2</sub> O | 0.1 M KOH        | 82              | 0.76                      | 21               |
| HPCS-S                                                              | 0.1 M KOH        | 70              | /                         | 22               |
| rGO/PEI                                                             | 0.1 M KOH        | 90.7            | 0.8                       | 23               |
| G-COF-950                                                           | 0.1 M KOH        | 75              | 0.74                      | 24               |
| Ni-N <sub>2</sub> O <sub>2</sub> /C                                 | 0.1 M KOH        | 96              | /                         | 25               |
| CMK3-20                                                             | 0.1 M KOH        | 90              | 0.79                      | 26               |
| HCNFs                                                               | 0.1 M KOH        | 97.3            | 0.80                      | 27               |
| OCNS <sub>900</sub>                                                 | 0.1 M KOH        | 90              | 0.825                     | 28               |
| CB-Plasma                                                           | 0.1 M KOH        | ~100            | 0.80                      | 29               |



**Table S2.** Calculated H<sub>2</sub>O<sub>2</sub> productivity of NHCSs with reported 2e<sup>-</sup> ORR catalysts using H-cell.

| Electrocatalyst                                                     | Electrolyte      | FE (%)      | Productivity                                               | Reference        |
|---------------------------------------------------------------------|------------------|-------------|------------------------------------------------------------|------------------|
| <b>NHCSs</b>                                                        | <b>0.1 M KOH</b> | <b>96.7</b> | <b>7.32 mol g<sub>cat</sub><sup>-1</sup>h<sup>-1</sup></b> | <b>This work</b> |
| Bi <sub>2</sub> Te <sub>3</sub> NPs                                 | 0.1 M KOH        | /           | 6.86 mmol L <sup>-1</sup> h <sup>-1</sup>                  | 12               |
| Co1-NG(O)                                                           | 0.1 M KOH        | /           | ~418 mmol g <sup>-1</sup> h <sup>-1</sup>                  | 13               |
| N-FLG-8                                                             | 0.1 M KOH        | ~100        | ~9.66 mol g <sub>cat</sub> <sup>-1</sup> h <sup>-1</sup>   | 14               |
| Co-POC-O                                                            | 0.1 M KOH        | 78          | 813 mg L <sup>-1</sup> h <sup>-1</sup>                     | 15               |
| MOF NSs-300                                                         | 0.1 M KOH        | N/A         | ~6.5 mol g <sub>cat</sub> <sup>-1</sup> h <sup>-1</sup>    | 16               |
| Co-N-C                                                              | 0.1 M KOH        | N/A         | ~4.33 mol g <sub>cat</sub> <sup>-1</sup> h <sup>-1</sup>   | 17               |
| GO/H <sub>2</sub> O <sub>2</sub> /NH <sub>3</sub> ·H <sub>2</sub> O | 0.1 M KOH        | 43.6        | 0.2248 mol g <sub>cat</sub> <sup>-1</sup> h <sup>-1</sup>  | 21               |
| HPCS-S                                                              | 0.1 M KOH        | 70          | 0.184 mol g <sub>cat</sub> <sup>-1</sup> h <sup>-1</sup>   | 22               |
| rGO/PEI                                                             | 0.1 M KOH        | 90.7        | 0.106 mol g <sub>cat</sub> <sup>-1</sup> h <sup>-1</sup>   | 23               |
| G-COF-950                                                           | 0.1 M KOH        | 69.8        | 1.287 mol g <sub>cat</sub> <sup>-1</sup> h <sup>-1</sup>   | 24               |
| Ni-N <sub>2</sub> O <sub>2</sub> /C                                 | 0.1 M KOH        | 91          | 5.9 mol g <sub>cat</sub> <sup>-1</sup> h <sup>-1</sup>     | 25               |
| CMK3-20                                                             | 0.1 M KOH        | 95          | 2.476 mol g <sub>cat</sub> <sup>-1</sup> h <sup>-1</sup>   | 26               |
| HCNFs                                                               | 0.1 M KOH        | /           | 6.37 mmol L <sup>-1</sup> h <sup>-1</sup>                  | 27               |
| OCNS <sub>900</sub>                                                 | 0.1 M KOH        | 89.6        | 770 mmol g <sup>-1</sup> h <sup>-1</sup>                   | 28               |
| CB-Plasma                                                           | 0.1 M KOH        | 100         | /                                                          | 29               |

## References

1. G. Kresse and J. Furthmüller, *Phys. Rev. B*, 1996, **54**, 11169.
2. P. E. Blöchl, *Phys. Rev. B*, 1994, **50**, 17953-17979.
3. J. P. Perdew, K. Burke and M. Ernzerhof, *Phys. Rev. Lett.*, 1996, **77**, 3865–3868.
4. S. Grimme, J. Antony, S. Ehrlich and H. Krieg, *J. Chem. Phys.*, 2010, **132**, 154104.
5. H. J. Monkhorst and J. D. Pack, *Phys. Rev. B*, 1976, **13**, 5188-5192.
6. S. Siahrostami, A. Verdaguer-Casadevall, M. Karamad, D. Deiana, P. Malacrida, B. Wickman, M. Escudero-Escribano, E. A. Paoli, R. Frydendal, T. W. Hansen, I. Chorkendorff, I. E. L. Stephens and J. Rossmeisl, *Nat. Mater.*, 2013, **12**, 1137-1143.
7. Z. Lu, G. Chen, S. Siahrostami, Z. Chen, K. Liu, J. Xie, L. Liao, T. Wu, D. Lin, Y. Liu, T. F. Jaramillo, J. K. Nørskov and Y. Cui, *Nat. Catal.*, 2018, **1**, 156–162.
8. X. Zhao, Y. Wang, Y. Da, X. Wang, T. Wang, M. Xu, X. He, W. Zhou, Y. Li, J. N. Coleman and Y. Li, *Natl. Sci. Rev.*, 2020, **7**, 1360-1366.
9. G. Han, F. Li, W. Zou, M. Karamad, J-P. Jeon, S-W Kim, S-J. Kim, Y. Bu, Z. Fu, Y. Lu, S. Siahrostami and J-B Baek, *Nat. Commun.*, 2020, **11**, 2209.
10. J. K. Nørskov, J. Rossmeisl, A. Logadottir, L. Lindqvist, J. R. Kitchin, T. Bligaard and H. Jónsson, *J. Phys. Chem. B*, 2004, **108**, 17886-17892.
11. <http://webbook.nist.gov/chemistry/>.
12. N. Zhang, F. Zheng, B. Huang, Y. Ji, Q. Shao, Y. Li, X. Xiao and X. Huang, *Adv. Mater.*, 2020, **32**, 1906477.
13. E. Jung, H. Shin, B.-H. Lee, V. Efremov, S. Lee, H. S. Lee, J. Kim, W. H. Antink, S. Park, K.-S. Lee, S.-P. Cho, J. S. Yoo, Y.-E. Sung and T. Hyeon, *Nat. Mater.*, 2020, **19**, 436–442.
14. L. Li, C. Tang, Y. Zheng, B. Xia, X. Zhou, H. Xu and S.-Z. Qiao, *Adv. Energy Mater.*, 2020, **10**, 2000789.
15. B.-Q. Li, C.-X. Zhao, J.-N. Liu and Q. Zhang, *Adv. Mater.*, 2019, **31**, 1808173.
16. M. Wang, N. Zhang, Y. Feng, Z. Hu, Q. Shao and X. Huang, *Angew. Chem. Int. Ed.*, 2020, **59**, 14373–14377.
17. Y. Sun, A. Bagger, N. Ranjbar, W. Ju, J. Li, A. Zitolo, S. Li, L. Silvioli, L.

- Arnarson, X. Wang, T. Möller, D. Bernsmeier, J. Rossmeisl, F. Jaouen and P. Strasser, *J. Am. Chem. Soc.*, 2019, **141**, 12372–12381.
18. C. Tang, Y. Jiao, B. Shi, J. Liu, Z. Xie, X. Chen, Q. Zhang and S. Qiao, *Angew. Chem. Int. Ed.*, 2020, **59**, 9171–9176.
19. H. W. Kim, M. B. Ross, N. Kornienko, L. Zhang, J. Guo, P. Yang and B. D. McCloskey, *Nat. Catal.*, 2018, **1**, 282–290.
20. S. Chen, Z. Chen, S. Siahrostami, D. Higgins, D. Nordlund, D. Sokaras, T. R. Kim, Y. Liu, X. Yan, E. Nilsson, R. Sinclair, J. K. Nørskov, T. F. Jaramillo and Z. Bao, *J. Am. Chem. Soc.*, 2018, **140**, 7851–7859.
21. L. Han, Y. Sun, S. Li, C. Cheng, C. E. Halbig, P. Feicht, J. L. Hübner, P. Strasser and S. Eigler, *ACS Catal.*, 2019, **9**, 1283–1288
22. G. Chen, J. Liu, Q. Li, P. Guan, X. Yu, L. Xing, J. Zhang and R. Che, *Nano Res.*, 2019, **12**, 2614–2622.
23. X. Xiao, T. Wang, J. Bai, F. Li, T. Ma and Y. Chen, *ACS Appl. Mater. Interfaces*, 2018, **10**, 42534–42541.
24. J. Zhang, G. Zhang, S. Jin, Y. Zhou, Q. Jia, H. Lan, H. Liu and J. Qu, *Carbon*, 2020, **163**, 154–161.
25. Y. Wang, R. Shi, L. Shang, G. I. N. Waterhouse, J. Zhao, Q. Zhang, L. Gu and T. Zhang, *Angew. Chem. Int. Ed.*, 2020, **59**, 13057–13062.
26. Y. Wang, S. Li, X. Yang, G. Xu, Z. Zhu, P. Chen and S. Li, *J. Mater. Chem. A*, 2019, **7**, 21329–21337.
27. K. Dong, J. Liang, Y. Wang, Z. Xu, Q. Liu, Y. Luo, T. Li, L. Li, X. Shi, A. Asiri, Q. Li, D. Ma and X. Sun, *Angew. Chem. Int. Ed.*, 2021, **60**, 10583–10587.
28. S. Chen, T. Luo, K. Chen, Y. Lin, J. Fu, K. Liu, C. Cai, Q. Wang, H. Li, X. Li, J. Hu, H. Li, M. Zhu and M. Liu, *Angew. Chem. Int. Ed.*, 2021, **60**, 16607–16614.
29. Z. Wang, K. Li, C. Zhang, Z. Cheng, W. Chen, E. Mchugh, R. Carter, B. Yakobson and J. Tour, *ACS Catal.*, 2021, **11**, 2454–2459.
